1 **Title**

2 Nucleus- and plastid-targeted annexin 5 promotes reproductive development in  
3 Arabidopsis and is essential for pollen and embryo formation

4 Malgorzata Lichocka, Wojciech Rymaszewski, Karolina Morgiewicz, Izabela  
5 Barymow-Filoniuk, Aleksander Chlebowski, Mirosław Sobczak, Marcus A. Samuel,  
6 Elmon Schmelzer, Magdalena Krzymowska, Jacek Hennig

7 Malgorzata Lichocka

8 Institute of Biochemistry and Biophysics, Polish Academy of Sciences, Pawinskiego  
9 5a, 02-106 Warsaw, Poland

10 [mlichocka@ibb.waw.pl](mailto:mlichocka@ibb.waw.pl)

11 Wojciech Rymaszewski

12 Institute of Biochemistry and Biophysics, Polish Academy of Sciences, Pawinskiego  
13 5a, 02-106 Warsaw, Poland

14 [wrymaszewski@gmail.com](mailto:wrymaszewski@gmail.com)

15 Karolina Morgiewicz

16 Institute of Biochemistry and Biophysics, Polish Academy of Sciences, Pawinskiego  
17 5a, 02-106 Warsaw, Poland

18 [kworoniecka@ibb.waw.pl](mailto:kworoniecka@ibb.waw.pl)

19 Izabela Barymow-Filoniuk

20 Institute of Biochemistry and Biophysics, Polish Academy of Sciences, Pawinskiego

21 5a, 02-106 Warsaw, Poland

22 izabela.barymow@gmail.com

23 Aleksander Chlebowski

24 Institute of Biochemistry and Biophysics, Polish Academy of Sciences, Pawinskiego

25 5a, 02-106 Warsaw, Poland

26 olobiolo@gmail.com

27 Mirosław Sobczak

28 Department of Botany, Warsaw University of Life Sciences (SGGW), Warsaw,

29 Poland

30 mirosław\_sobczak@sggw.pl

31 Marcus A. Samuel

32 Department of Biological Sciences, University of Calgary, Alberta, Canada

33 msamuel@ucalgary.ca

34 Elmon Schmelzer

35 Max-Planck Institute for Plant Breeding Research, Cologne, Germany

36 schmelektromail@web.de

37 Magdalena Krzymowska

38 Institute of Biochemistry and Biophysics, Polish Academy of Sciences, Pawinskiego

39 5a, 02-106 Warsaw, Poland

40 krzyna@ibb.waw.pl

41 Jacek Hennig

42 Institute of Biochemistry and Biophysics, Polish Academy of Sciences, Pawinskiego

43 5a, 02-106 Warsaw, Poland

44 jacekh@ibb.waw.pl

45

46 \*Address correspondence to Malgorzata Lichocka, e-mail: [mlichocka@ibb.waw.pl](mailto:mlichocka@ibb.waw.pl)

47

## 48 **Abstract**

## 49 **Background**

50 Pollen development is a strictly controlled post-meiotic process during which  
51 microspores differentiate into microgametophytes and profound structural and  
52 functional changes occur in organelles. Annexin 5 is a calcium- and lipid-binding  
53 protein that is highly expressed in pollen grains and regulates pollen development  
54 and physiology. To gain further insights into the role of ANN5 in Arabidopsis  
55 development, we performed detailed phenotypic characterization of Arabidopsis  
56 plants with modified *ANN5* levels. In addition, interaction partners and subcellular  
57 localization of ANN5 were analyzed to investigate potential functions of ANN5 at  
58 cellular level.

## 59 **Results**

60 Here, we report that RNAi-mediated suppression of *ANN5* results in formation of  
61 smaller pollen grains, enhanced pollen lethality, and delayed pollen tube growth.  
62 *ANN5* RNAi knockdown plants also displayed aberrant development during the  
63 transition from the vegetative to generative phase and during embryogenesis,  
64 reflected by delayed bolting time and reduced embryo size, respectively. At the  
65 subcellular level, *ANN5* was delivered to the nucleus, nucleolus, and cytoplasm, and  
66 was frequently localized in plastid nucleoids, suggesting a likely role in interorganellar  
67 communication. Furthermore, *ANN5*-YFP co-immunoprecipitated with RABE1b, a  
68 putative GTPase, and interaction *in planta* was confirmed in plastidial nucleoids using  
69 FLIM-FRET analysis.

## 70 **Conclusions**

71 Our findings let us to propose that *ANN5* influences basal cell homeostasis via  
72 modulation of plastid activity during pollen maturation. We hypothesize that the role  
73 of *ANN5* is to orchestrate the plastidial and nuclear genome activities via protein-  
74 protein interactions however not only in maturing pollen but also during the transition  
75 from the vegetative to the generative growth and embryo development.

76

77 **Keywords:** Arabidopsis, accession, annexin, pollen grain, seed, embryo, plastid,  
78 nucleoid, chlorophyll, Rab GTPase

79

## 80 **Background**

81 In angiosperms, the male gametophyte (microgametophyte or pollen grain) plays an  
82 essential role in the reproductive success of the species, and normal pollen  
83 development under challenging environmental conditions is a highly desirable  
84 agronomic trait in various crops. Development of a male gametophyte is a complex  
85 process that takes place in the anther locules, where microspore mother cells  
86 undergo meiosis to produce haploid microspores [1, 2]. Developing microspores take  
87 up nutrients from the tapetum, an inner layer of cells in the anther locule. This  
88 secretory tissue provides soluble carbohydrates for microspore growth and lipids for  
89 pollen cell wall formation [3, 4]. Despite being dependent upon nutrient delivery from  
90 the tapetum, microspore plastids undergo intensive structural reorganization as the  
91 microspore matures [2]. In young microspores, plastids are poorly differentiated and  
92 lack any internal membranous system. Before the first mitosis, the plastids develop a  
93 few thylakoids and differentiate into amyloplasts and accumulate starch transiently  
94 until the bicellular stage of microgametogenesis. Following the second mitosis, the  
95 tricellular mature pollen grain is made up of one vegetative cell (VC) and two sperm  
96 cells. At this stage, the pollen plastids contain only negligible amounts of starch as  
97 the majority of the starch is hydrolyzed [5]. Although limited in number in developing  
98 microspores, these plastids are crucial for pollen viability as various mutants  
99 defective in plastid carbohydrate metabolism exhibit pollen sterility [6].

100 Genes important for male gametophyte development can be assigned as either  
101 'early' or 'late', according to their spatiotemporal expression pattern. The 'early'  
102 genes are the first to be activated in the microspore, and their expression levels  
103 decrease as pollen maturation approaches. The 'late' genes are activated after the  
104 first microspore mitosis, and their transcripts accumulate during pollen maturation [7].

105 One of the late genes in the developing microspore is annexin 5 (*ANN5*). *ANN5*

106 promoter activity was detected in the bicellular microspore, and maximum *ANN5*  
107 transcript abundance correlated with pollen maturation [7, 8]. Annexins belong to a  
108 ubiquitous family of proteins present in eukaryotic organisms [9, 10] localized to  
109 various subcellular compartments [11]. Due to their calcium- and membrane-binding  
110 capacity, annexins are known to be involved in a variety of cellular processes such as  
111 actin binding, maintenance of vesicular trafficking, cellular redox homeostasis, and  
112 ion transport [12]. *ANN5* was previously characterized biochemically and, like other  
113 annexins, associated with liposomes in a calcium-dependent manner and bound  
114 actin [13]. Pollen tubes overexpressing *ANN5* displayed enhanced resistance to  
115 Brefeldin A (BFA), an inhibitor of vesicular protein transport, which suggested that  
116 *ANN5* promoted membrane trafficking downstream of the block by BFA. Supporting  
117 this, RNAi-based down-regulation of *ANN5* resulted in enhanced pollen lethality [8].  
118 However, the mechanisms through which *ANN5* affects microspore development  
119 remain unknown. Our results show that *ANN5* function is not limited to male  
120 gametophyte development but plays a central role during the entire reproductive  
121 development process in *Arabidopsis*. We further show that *ANN5* localizes to the  
122 nucleus and the plastids, implicating *ANN5* in crosstalk between cellular  
123 compartments essential for the maintenance of cellular homeostasis.

## 124 **Materials**

### 125 **Plant material and growth conditions**

126 The experiments were carried out on *Arabidopsis thaliana* and *Nicotiana*  
127 *benthamiana* plants. Modified *ANN5* expression was introduced in *Arabidopsis* Col-0  
128 background. The other *Arabidopsis* accessions: An-1, Bay-0, C24, Ler-1, Mr-0, Oy-0  
129 and Wa-1 were obtained from NASC (<http://arabidopsis.info/>). *Arabidopsis* plants

130 were grown in Jiffy7 pots in controlled-environment chambers (Percival Scientific,  
131 Iowa, USA) at 22°C under 8 h of light and 40% humidity. *N. benthamiana* plants were  
132 grown in soil under controlled environmental conditions (21°C, 16 h of light).

### 133 **Arabidopsis phenotype characterization**

134 For phenotypic studies we used seeds of two selected *ANN5*-RNAi lines: *ANN5*-  
135 RNAi\_13, *ANN5*-RNAi\_15, OE\_2 line and wild-type *Arabidopsis* Col-0. Five seeds of  
136 each genotype were placed per Jiffy7 pot. After 2 days of stratification at 4°C the pots  
137 were placed under 12 h light/12 h dark photoperiod or under short day (8 h of light)  
138 for 4 weeks followed by long day (16 h of light) conditions (sd/ld) at 22°C and 40%  
139 humidity in the growth chamber. The light during the day period was provided with  
140 mixed fluorescent tubes and incandescent bulbs. Total photon flux density at the soil  
141 level was 120  $\mu\text{E m}^{-2} \text{s}^{-1}$ . After reaching two cotyledons stage only one seedling per  
142 pot was further cultured and the rest was removed. Each developmental stage was  
143 recorded for 7-10 individual plants per genotype. All plants were daily inspected from  
144 germination until siliques ripening. Bolting time was measured as the number of days  
145 from germination to the first elongation of the floral stem at 0.1 cm height. Flowering  
146 time was estimated as the number of days from germination to the first flower  
147 opening. After fading of the first flower the time of silique formation was recorded.  
148 Trays with growing plants were rotated three times per week for uniform plant  
149 development. Data were analyzed using Microsoft Excel and R freeware software  
150 (<http://www.r-project.org>).

151

### 152 **Seed size measurements**

153 During *Arabidopsis* growth all the auxiliary buds were removed. Once the siliques  
154 formed on the main bolt, turned almost completely brown they were harvested into a  
155 microcentrifuge tubes. The siliques were let to air-dry in the open tubes for several  
156 days prior to measurements. The dry seeds were dispersed on microscope slides  
157 and several images were collected under the stereoscopic microscope (SMZ1500,  
158 Nikon Instruments B.V. Europe, Amsterdam, The Netherlands). Following the  
159 conversion of images to black-white images using the threshold function of ImageJ  
160 software the area of the individual seed was calculated as described previously [14].

### 161 **Chlorophyll extraction and measurement**

162 Col-0 wild-type, *ANN5-OE\_2* and *ANN5\_OE1* seeds were surface-sterilized with 75%  
163 ethanol for 2 min and then with 10% sodium hypochlorite for 10 min. Next, the seeds  
164 were washed three times with sterile water and spread onto agar-solidified (1% w/v)  
165 MS media (Duchefa, Amsterdam, The Netherlands) supplemented or not with 1.5%  
166 (w/v) sucrose. After 2 days stratification at 4°C, the plates were placed in the growth  
167 chamber under a photon flux density of 220  $\mu\text{E m}^{-2} \text{s}^{-1}$  at the shelf level. Seedlings  
168 were grown under short-day conditions (8 h light) for 10 days. Aerial part of 10 day  
169 old seedlings were harvested, weighed and kept at -80°C. Samples were  
170 mechanically ground in 2 ml microfuge tubes with two stainless-steel beads by a  
171 bead mill (TissueLyser II, Qiagen, Hilden, Germany). After extraction with 1 ml cold  
172 80% acetone, the samples were centrifuged 6000 rpm for 5 min at 4°C. Extraction  
173 was repeated two times with fresh solvent. Absorbance of the pooled extracts was  
174 measured at 664 and 647 nm with a spectrophotometer (UV-1202, Shimadzu, Kyoto,  
175 Japan). Chlorophyll content was calculated using equations described previously  
176 [15].



## 177 **Plasmid constructions for transient and stable expression in planta**

178 Coding sequence of *ANN5* was PCR amplified using primers adding BglII-BamHI  
179 restriction sites: forward 5'-AGATCTCGATGGCGACTCTTAAGGTTTCT-3' and  
180 reverse 5'-GGATCCTAGCATCATCTTCACCGAGAA-3' and cloned into modified  
181 pSAT4A plasmid bearing the full-length cDNA sequence of YFP. The expression  
182 cassette 35S:ANN5-YFP was subcloned into pZP-RCS2 binary plasmid [16]. In  
183 parallel, coding sequence of *ANN5* was also PCR amplified with primers adding Sall-  
184 EcoRV restriction sites: forward 5'-GTCGACATGGCAACAATGAA-3' and reverse 5'-  
185 GATATCCAACGTTGGGGCCTAAAAGAGAGAG-3' and cloned into pENTR1A vector  
186 compatible with the Gateway system. The resulting plasmid was LR recombined into  
187 GWB441 and GWB442 binary plasmids [17]. Coding sequence of *RABE1b* was PCR  
188 amplified using primers adding Sall-XhoI restriction sites: forward 5'-  
189 GTCGACATGGCGAAGATGATGATGTTGC-3' and reverse 5'-  
190 CTCGAGGCTTGAAGAACAAGTTTCTTGCTCAG-3'. The amplified coding  
191 sequences were cloned into pENTR1A vector, then LR recombined into GWB444  
192 [17].

193 Agrikola binary plasmids (<http://www.agrikola.org/>) for targeted *ANN5* RNAi silencing  
194 were obtained from NASC (<http://arabidopsis.info/>) [18]. pAgrikola plasmids contain a  
195 fragment of a gene coding sequence, called gene specific tag (GST), under the  
196 control of 35S promoter that enables production of double-stranded hairpin RNA  
197 (hpRNA) necessary for targeted gene silencing [18]. GST in pAgrikola  
198 35S:ANN5(GST)-RNAi corresponded to 214 bp long fragment of *ANN5* coding  
199 sequence starting at position 668 and ending at 881.

200 Wild-type Arabidopsis Col-0 plants were transformed with the following constructs:  
201 pPZP-RCS2 35S:*ANN5-YFP*, pAgrikola 35S:*ANN5(GST)*-RNAi and pCAMBIA 1302  
202 35S:*GFP* using floral dipping method [19] with *Agrobacterium tumefaciens* strain  
203 GV3101 carrying helper plasmids pMP90 and pSOUP. *ANN5*-RNAi transformants  
204 were identified using Basta-based selection procedure (<http://www.agrikola.org/>),  
205 whereas selection of 35S:*ANN5-YFP* and 35S:*GFP* transformants was performed  
206 directly on MS plates under fluorescence stereo microscope.

207 To study subcellular localization of *ANN5* and *RABE1b* *Agrobacterium* cultures  
208 carrying appropriate constructs were infiltrated into leaves of *N. benthamiana*, which  
209 were examined after 72 h under fluorescence confocal microscope (Nikon C1  
210 Instruments B.V. Europe, Amsterdam, The Netherlands).

#### 211 **RNA extraction and RT-qPCR**

212 Total RNA was isolated from vegetative and generative Arabidopsis tissues using  
213 Syngen Plant RNA Mini Kit (Syngen, Wroclaw, Poland). Mature pollen grains were  
214 collected on ice-cold 0.3 M mannitol, according to the procedure described previously  
215 [20]. Isolated RNA was quantified with a NanoDrop ND-1000 spectrophotometer  
216 (Thermo Fisher Scientific, USA) and subjected to DNA digestion (Rapid out DNA  
217 removal kit, Thermo Fisher Scientific). First cDNA was synthesized using 2 µg RNA  
218 and Superscript III kit (Thermo Fisher Scientific, USA). qPCR was performed with the  
219 SYBR green master mix (Thermo Fisher Scientific, USA) using Light Cycler 480  
220 (Roche, Basel, Switzerland). Reactions were run in triplicate with three different  
221 cDNA preparations. The relative expression level was normalized with the expression  
222 of the reference genes (*UBC21*, *PP2A* and *YLS8*) and quantified by  $\Delta C_t$  method.  
223 Primers for RT-qPCR are listed in Additional file 9.

## 224 **Protein extraction and immunoprecipitation**

225

226 The samples collected from 12 days old Arabidopsis seedlings revealing constitutive  
227 expression of ANN5-YFP or GFP were ground in liquid nitrogen. Samples were then  
228 thawed in 2 ml of extraction buffer (50 mM Tris-HCl, pH 7.5; 50 mM NaCl; 6 mM  
229 EDTA; protease inhibitor PMSF; 0.5% [v/v] Triton X-100) per 1 g of tissue powder.  
230 Samples were centrifuged at 13 000 rpm and 4°C for 20 min. Collected supernatants  
231 were adjusted to 3 mg ml<sup>-1</sup> of total proteins and incubated with GFP-TrapA-beads  
232 (Chromotek, USA) for 4 h at 4°C. After incubation the supernatant was discarded and  
233 the beads were washed using 50 mM Tris-HCl (pH 7.5), 150 mM NaCl and 2 mM  
234 EDTA buffer. Proteins were eluted using 200 mM glycine (pH 2.5). The eluted  
235 proteins were trypsin digested and subjected to mass spectrometry.

236

## 237 **Mass Spectrometry Analysis**

238

239 Liquid chromatography-mass spectrometry analyses of the peptide mixtures were  
240 performed on the Orbitrap spectrometer (Thermo Fisher Scientific, USA) and the  
241 Mascot program was used for database searches as described previously [21].

## 242 **Confocal laser scanning microscopy**

243 Subcellular localization of the fusion proteins was evaluated using a Nikon C1  
244 confocal system built on TE2000E and equipped with a 60× Plan-Apochromat oil  
245 immersion objective (Nikon Instruments B.V. Europe, Amsterdam, The Netherlands).  
246 GFP/YFP fusion proteins were excited with a Sapphire 488 nm laser (Coherent,  
247 Santa Clara, CA, USA) and observed using the 515/530 nm emission filter. CFP

248 fusion protein and DAPI fluorescence were excited with a 408 nm diode laser and  
249 detected using the 450/35 nm emission filter. Embryos stained with FM4-64 were  
250 excited with 543 nm HeNe laser and observed using the 605/75 nm barrier filter.  
251 Confocal images were deconvoluted and pseudocolored using ImageJ software.

## 252 **FLIM-FRET**

253 For FLIM-FRET (Fluorescence Lifetime Imaging Microscopy-Förster Resonance  
254 Energy Transfer) RABE1b was fused to CFP (donor) and transiently expressed in *N.*  
255 *benthamiana* leaves in the presence or absence of the potential interacting partner  
256 ANN5 fused to YFP (acceptor). Cells were imaged with an FV100 confocal system  
257 (Olympus, Tokyo, Japan) equipped with a 60x water immersion objective lens. For  
258 FLIM CFP fusion protein was excited with a 440 nm pulsed diode laser (Sepia II,  
259 PicoQuant, Berlin, Germany) and detected using a 482/35 bandpass filter. Images  
260 were acquired with a frame size of 256 × 256 pixels. Photons were collected with a  
261 SPAD detector and counted with the PicoHarp 300 TCSPC module (Picoquant). The  
262 obtained data were analyzed with Symphotime software (PicoQuant). Fluorescence  
263 lifetimes of CFP in plastid nucleoids were calculated by fitting a bi-exponential decay  
264 model.

## 265 **Transmission and scanning electron microscopy**

266 Flower buds and flowers at anthesis were sampled from Arabidopsis Col-0 wild type,  
267 ANN5-RNAi\_13, ANN5-RNAi\_15 and ANN5-OE\_2 genotypes. Plant samples were  
268 fixed in a mixture of 2% paraformaldehyd (w/v) and 2% glutaraldehyde (v/v) in 0.05 M  
269 sodium cacodylate buffer for 2 h at room temperature. Samples were post fixed in  
270 osmium tetroxide, dehydrated in ethanol and embedded in EPON resin according to

271 [22]. Ultrathin sections were examined in an FEI 268 D ‘Morgagni’ (FEI Corp.,  
272 Hillsboro, OR, USA) transmission electron microscope equipped with an SIS  
273 ‘Morada’ digital camera (Olympus SIS, Münster, Germany).

274 Mature pollen grains were collected directly into a cap of the microfuge tube. They  
275 were processed for scanning electron microscopy as described previously [23].  
276 Imaging was performed with a Zeiss Spura 40VP (Zeiss, Jena, Germany) scanning  
277 electron microscope operating at 10 kV.

## 278 **Results**

279

### 280 ***ANN5* is expressed in a tissue-specific manner**

281 Earlier studies demonstrated that *ANN5* was predominantly expressed in mature  
282 flowers [8, 24]. To further characterize *ANN5* expression, we analyzed vegetative and  
283 reproductive organs of *Arabidopsis* using RT-qPCR. *ANN5* transcripts were less  
284 abundant during vegetative growth than in reproductive tissues of *Arabidopsis* (Fig.  
285 1A), and were nearly undetectable in 3-day-old seedlings, rosette leaves, and roots.  
286 After the transition to the generative phase, a slight increase in *ANN5* expression  
287 level was observed in the developing stem and strong expression was detected in  
288 young developing siliques. A separate analysis of the pistils and stamens revealed  
289 that the strongest *ANN5* expression was seen in the male organs, with the highest  
290 *ANN5* transcript abundance observed in mature pollen (Fig. 1B).

### 291 ***Arabidopsis* accessions differ in *ANN5* expression**

292 Elevated expression of *ANN5* correlated with pollen grain maturation in Col-0 plants  
293 (Fig. 1B), and we wished to determine whether this was consistent among

294 *Arabidopsis* accessions. Eight *Arabidopsis* accessions, originally derived from  
295 different habitats, were selected and cultivated until flowering under short day and  
296 long day conditions: An-1, C24, Col-0, Ler-1, Bay-0, Wa-1, Oy-0, Mr-0. RT-qPCR  
297 analysis of RNA isolated from flower buds and mature flowers revealed differences in  
298 *ANN5* expression among the accessions (Fig. 1C). Wa-1, C24, and Mr-0 exhibited a  
299 Col-0-type expression pattern with higher *ANN5* mRNA levels in mature flowers than  
300 in buds. In Bay-0, Oy-0, and Ler-1, *ANN5* expression was already elevated in the  
301 flower buds and remained at similar levels during anthesis. An-1 exhibited the most  
302 unusual *ANN5* expression profile: very high expression was observed in flower buds  
303 but expression dropped precipitously in the mature flowers. Accession-specific  
304 patterns of *ANN5* expression might reflect possible differences in male gametophyte  
305 development among *Arabidopsis* accessions.

### 306 **Suppression of *ANN5* leads to a delay in generative development in** 307 ***Arabidopsis***

308 Previous research showed that RNAi (RNA interference)-based suppression of *ANN5*  
309 driven by the pollen-specific promoter *LAT52* led to enhanced pollen lethality [8],  
310 suggesting that a knockout might be lethal or male sterile. Here, an RNAi approach  
311 was used to generate *ANN5* knockdowns using the AGRİKOLA RNAi plasmid  
312 carrying 214 bp of the *ANN5* coding sequence under the control of a 35S promoter  
313 [18]. The obtained RNAi lines exhibited moderate suppression at anthesis, with  
314 *ANN5* levels reduced by 20–80% compared with control Col-0 plants. Two *ANN5*  
315 RNAi lines, *ANN5*-RNAi\_13 and *ANN5*-RNAi\_15, with 50% and 70% *ANN5*  
316 suppression, respectively, were selected for detailed phenotypic analysis (Additional  
317 file 1). Lines were also generated that ectopically overexpressed *ANN5* (OE) under

318 the control of the 35S promoter. OE lines exhibited extremely elevated *ANN5*  
319 transcript abundance compared with the wild type (approximately 100-fold increase)  
320 (Additional file 1).

321 Developmental and morphometric analyses of the selected *ANN5* RNAi lines were  
322 conducted under two light regimes: i) 28 days under short day conditions (sd; 8 h  
323 light) followed by growth under long day conditions (ld; 12 h light) for the remainder of  
324 the experimental period, and ii) 12 h light / 12 h dark throughout the whole  
325 experimental period. Germination of all selected lines was equivalent under both  
326 conditions. Developmental differences between the RNAi lines and wild-type Col-0  
327 plants became apparent during the transition from vegetative to generative  
328 development, i.e., at bolting (formation of a flower stem) (Table 1, Additional file 2).  
329 *ANN5* RNAi-silenced lines bolted approximately 8 days later than wild-type plants  
330 under the sd/ld light regime (Table 1). By contrast, the bolting delay was only  
331 approximately 2 days under the 12 h light regime (Additional file 2). Delay in  
332 progression to subsequent growth stages was observed in the *ANN5* RNAi lines, but  
333 only under sd/ld conditions. Initiation of flowering and first silique formation were  
334 delayed by approximately 11 days in *ANN5* RNAi plants compared with control  
335 plants. Transgenic Arabidopsis overexpressing *ANN5* exhibited slightly increased  
336 growth rates during rosette formation and stem elongation compared with control  
337 plants (Additional file 2); however, developmental progression to the subsequent  
338 growth stages was similar to that of wild-type plants under both light regimes (Table  
339 1, Additional file 2).

340 **Pollen viability and grain size correlate with *ANN5* expression level**

341 Phenotypic studies revealed that onset of the generative stage was delayed in *ANN5*  
342 RNAi knockdown plants compared with wild-type Col-0 plants, but plant  
343 morphological characteristics, i.e., foliage rosette formation, leaf morphology, and  
344 inflorescence structure, were generally unaffected. However, abnormal flowers with  
345 additional petals and/or missing stamens were observed in *ANN5* RNAi-silenced  
346 plants (Additional file 3). We next tested whether suppression of *ANN5* expression  
347 affected pollen viability, using Alexander's solution to differentiate between aborted  
348 and non-aborted pollen grains. Anthers of *ANN5* RNAi-silenced lines contained  
349 numerous aborted pollen grains (green-colored) and fewer vivid pollen grains (pink-  
350 colored) than wild-type and *ANN5-OE\_2* plants (Additional file 3).

351 Pollen grains from *ANN5* RNAi-silenced lines were examined further using scanning  
352 electron microscopy. Cell wall formation was unaffected in *ANN5* RNAi-silenced and  
353 *ANN5-OE\_2* pollen, but mean pollen grain size was affected. *ANN5* RNAi-silenced  
354 pollen grains were significantly shorter (average 26  $\mu\text{m}$  along the longer axis) than  
355 *ANN5-OE\_2* pollen grains (29  $\mu\text{m}$ ) and wild-type pollen grains (27.5  $\mu\text{m}$ ) (Fig. 2a and  
356 Fig. 2C). *ANN5* transcript abundance was previously shown to correlate with pollen  
357 maturation in Col-0 plants (Fig. 1C) [7], and we therefore examined pollen maturation  
358 in altered and wild-type lines using transmission electron microscopy. Micrographs of  
359 pollen grains collected just before and during anthesis showed that progression of  
360 pollen grain maturation was similar in all the Arabidopsis genotypes examined (Fig.  
361 2D, Additional file 4). Profound reorganization of the VC encompassed i) partial  
362 hydrolysis of starch grains deposited within plastids, ii) formation of numerous initially  
363 small vesicles that eventually produced elaborate structures forming 'foamy'  
364 cytoplasm, and iii) conversion of storage lipids deposited in oil bodies. *ANN5*-RNAi



365 pollen grains only occasionally displayed reduced VC cytoplasm vesiculation  
366 compared with control Col-0 pollen. In contrast with wild-type pollen grains, which  
367 usually contained a single starch grain per plastid, plastids of *ANN5* RNAi-silenced  
368 pollen grains often contained several starch grains. Collapsing pollen grains of *ANN5*  
369 RNAi knockdown plants (particularly those of the *ANN5*-RNAi\_15 line) contained  
370 starch grains that were significantly larger and more numerous than those in aborted  
371 pollen of wild-type and *ANN5*-OE\_2 plants (Fig. 2E). The high starch content in the  
372 collapsing pollen grains of *ANN5* RNAi-silenced lines indicated that abortion of the  
373 microspores likely occurred before starch hydrolysis, which normally takes place at  
374 the bicellular stage of microgametophyte development.

### 375 ***ANN5* is required for pollen tube growth in pistils**

376 Pollen grain size and viability were affected by altered expression of *ANN5*. Previous  
377 research showed that germination rates and pollen tube growth of *ANN5* RNAi-  
378 silenced, OE, and wild-type pollen on a solid medium were similar and that the tubes  
379 were free of morphological aberrations [13]. Here, hand-pollination of pistils was used  
380 to assess the ability of *ANN5* RNAi-silenced and OE pollen grains to germinate and  
381 elongate under natural conditions on stigmas. The pistils were collected 3, 6, and 24  
382 hours after pollination and examined for pollen tube growth using a fluorescent  
383 technique. Great variations in the growth rate were repeatedly observed among  
384 individual pollen tubes derived from the pollen grains of the same *ANN5* RNAi-  
385 silenced line. In contrast, the growth rate of pollen tubes in wild-type and OE line  
386 were more equivalent. At 3 and 6 h after pollination the majority of the *ANN5* RNAi-  
387 silenced pollen tubes did not enter the pistil transmitting tissue although an excess of  
388 pollen grains was applied. At 6 h after pollination, pollen from *ANN5* RNAi knockdown

389 plants exhibited shorter pollen tubes (average 0.67 mm from the top of style to the  
390 front of the longest pollen tube) than pollen from wild-type (0.88 mm) and *ANN5*-  
391 OE\_2 line (0.91 mm) (Fig. 3). However, this discrepancy was no longer observed  
392 after 24 h (Additional file 5), by which time pollen tubes in all genotypes had  
393 traversed to the ovary and reached the ovules. Pollen tube growth rate is a major  
394 determinant of pollen competitive ability, and the arrested or delayed growth of *ANN5*  
395 RNAi-silenced pollen tubes in the pistil is indicative of lower male gametophyte  
396 competitiveness.

### 397 **Total seed yield correlates with *ANN5* expression level**

398 Although pollen viability was reduced, *ANN5* RNAi knockdown plants still produced  
399 sufficient amounts of viable pollen to successfully reproduce generatively. To quantify  
400 the final seed yield from lines with modified *ANN5* expression, 1000 seeds per  
401 genotype were collected and the individual seed areas were measured under a  
402 stereoscopic microscope. *ANN5* RNAi-silenced seeds were smaller, and *ANN5*-OE\_2  
403 seeds were larger, than wild-type Col-0 seeds (Fig. 4). To test whether silique  
404 position on the main bolt affected seed size, individual siliques were pooled into  
405 groups consisting of five successive siliques and the average seed size was  
406 calculated for each group. The average seed size decreased upwards towards the  
407 shoot in all the genotypes tested (Fig. 4C). Up to the 15th silique on the main bolt,  
408 seeds developed equally in wild-type Col-0 and *ANN5* RNAi knockdown plants.  
409 Above the 15th silique, average seed size was lower in *ANN5* RNAi lines than in the  
410 wild type. Average seed size decreased consecutively up the main bolt to the last  
411 examined silique, at the 40th node. Seeds collected from *ANN5*-OE\_2 plants were

412 consistently larger than wild-type seeds between the 11th and 40th nodes on the  
413 main bolt.

414 In Arabidopsis, embryos constitute most of the total volume of the mature seed, and  
415 the final size of dry seeds thus depends primarily on embryo size. Embryos dissected  
416 from *ANN5* RNAi-silenced seeds were smaller than those from wild-type seeds (Fig.  
417 4A). Taken together, these results indicate that *ANN5* affects flower and seed  
418 development during the reproductive phase of the Arabidopsis life cycle.

#### 419 **Multi-compartment targeting of ANN5-GFP**

420 Subcellular localization of *ANN5* was analyzed to gain insights into the mechanisms  
421 underlying its functions. First, the online software tools PSORT and WoLF PSORT  
422 ([www.genscript.com](http://www.genscript.com)) were used to predict *ANN5* subcellular localization. PSORT  
423 predicted localization to the nucleus, and WoLF PSORT predicted chloroplast  
424 localization. Additional software, Nuc-Plos, predicted *ANN5* localization to the  
425 nucleolus.

426 Transient expression of *35S:ANN5-GFP* and *35S:GFP-ANN5* gene constructs in  
427 *Nicotiana benthamiana* leaves was used to examine subcellular localization of *ANN5*  
428 *in vivo*. Confocal microscopy analysis revealed that *ANN5-GFP* was localized to the  
429 nucleus, nucleolus, and cytoplasm in all the epidermal cells examined (Fig. 5). In  
430 numerous cells, *ANN5-GFP* also accumulated in speckles inside the epidermal  
431 plastids, thus being fully consistent with the predictions.

432 The number of cells in which *ANN5-GFP* localized to the plastids varied significantly  
433 between experiments. Notably, when *ANN5* was found in a plastid within a cell, all  
434 the plastids of that cell contained *ANN5* (Fig. 5h). N-terminal tagging with GFP

435 resulted in the localization of ANN5 to the nucleus, nucleolus, and cytoplasm but  
436 eliminated plastid distribution (Fig. 5C and Fig. 5D). The punctate pattern of ANN5  
437 distribution inside the plastids resembled the positioning of nucleoids. To test this,  
438 leaf samples expressing *35S:ANN5-GFP* were stained with DAPI: ANN5 speckles in  
439 plastids fully colocalized with DAPI-stained plastid DNA (Fig. 6).

#### 440 **ANN5 interacts with RABE1b in plastid nucleoids**

441 To identify ANN5 binding partners, 12-day-old Arabidopsis seedlings expressing  
442 *35S:ANN5-YFP* were used in co-immunoprecipitation experiments using a GFP-  
443 TRAP system followed by mass spectrometry. Identified proteins were compared  
444 between ANN5-YFP samples and control GFP samples, and proteins that non-  
445 specifically co-purified with GFP were excluded. Many of the identified proteins were  
446 predicted to be localized in plastids, suggesting that many of these associations  
447 might occur in plastidial nucleoids. To further investigate the specific interactions of  
448 ANN5 in plastids, potential binding partners were identified from proteins predicted to  
449 be localized in plastids (Additional file 6). Of these, RABE1b, which had the highest  
450 Mascot score and was a putative GTPase predicted to be plastid associated, was  
451 selected for further characterization.

452 Transient co-expression of *35S:ANN5-YFP* and *35S:RABE1b-CFP* in *N.*  
453 *benthamiana* was used to determine whether ANN5 and RABE1b localized to the  
454 same cellular compartment. When each was expressed alone, ANN5 localized to the  
455 nucleus, nucleolus, and plastid nucleoids (Fig. 5), and RABE1b-GFP was  
456 predominantly found within the plastid nucleoids and, to a lesser extent, in the  
457 cytoplasm (Additional file 7). When co-expressed, RABE1b-CFP and ANN5-YFP  
458 were detected within the same plastidial nucleoids (Fig. 6G). FLIM-FRET analysis

459 was used to determine whether ANN5 and RABE1b interacted. In plastids, the  
460 average lifetime of the donor, RABE1b-CFP, decreased significantly in the presence  
461 of the putative acceptor ANN5-YFP (Fig. 6J). This confirmed physical interactions  
462 between ANN5 and RABE1b in the plastidial nucleoids.

### 463 **ANN5 affects chlorophyll content in cotyledons of Arabidopsis seedlings**

464 To check whether ANN5 affects plastid-related functions we analyzed greening of  
465 Arabidopsis seedlings with different ANN5 expression levels. To this end, the  
466 seedlings were grown on MS medium in the absence or presence of sucrose, for ten  
467 days (Additional file 8, Fig. S7A). Whereas ANN5 expression in wild-type seedlings  
468 was hardly detectable, the ectopic expression of ANN5 resulted in abundant  
469 transcript levels (Additional file 8, Fig. S7C). Spectrophotometric analyses of  
470 chlorophyll a and b in the seedling revealed that the total chlorophyll content in ANN5  
471 OE lines was significantly lower than in wild-type seedlings on both types of media  
472 (Additional file 8, Fig. S7B). We next compared, the expression of selected genes  
473 related to the chlorophyll metabolism, by RT-qPCR analysis (Additional file 8, Fig.  
474 S7C and S7D). Both ANN5 OE lines showed reduced expression of genes related to  
475 chlorophyll biosynthesis (*HEMA1*, *GUN4*, *GUN5*, *CHL11*) and photosynthesis (*PsbA*,  
476 *LHCB1*) in comparison to the wild-type, whereas the expression of chlorophyll  
477 catabolic genes (*NYC1*, *NYE1*, *SAG29*) was higher but only in the presence of  
478 sucrose. These data show that ANN5 overexpression affects chlorophyll  
479 accumulation in Arabidopsis seedlings.

## 480 **Discussion**

### 481 **ANN5 plays an essential role during reproductive development of Arabidopsis**

482 Annexins are implicated in a variety of cellular processes associated with membrane  
483 trafficking and calcium signaling [9-11, 25]. Annexins are mainly distributed within the  
484 cytoplasm and can reversibly interact with membranes in response to fluctuations in  
485 cellular calcium levels. When bound to calcium, hydrophobic residues are accessible  
486 on the surface of annexin, enabling interaction with phospholipids at the membrane  
487 interface [26]. ANN5 was also shown to possess the ability to bind lipids in a calcium-  
488 dependent manner [13]. Gradual increases in calcium concentration up to 200  $\mu\text{M}$   
489 enhanced ANN5 binding to liposomes *in vitro* [13]. Overexpression of *ANN5* in pollen  
490 tubes also conferred resistance to BFA, an inhibitor of the vesicular transport. Taken  
491 together, this research suggests that the biological activity of ANN5 might be related  
492 to membrane trafficking in a calcium-dependent manner.

493 The results from this study provide new insights into the function of ANN5 during  
494 Arabidopsis development. Large quantitative differences in *ANN5* transcript  
495 accumulation were observed between organs of wild-type Arabidopsis (Fig. 1), with  
496 the highest mRNA levels found in mature pollen. These results were consistent with a  
497 previous study showing that RNAi-mediated suppression of *ANN5* affected pollen  
498 development and led to reduced pollen viability [8]. Viable pollen grains from our  
499 RNAi knockdown lines were smaller in size and their growth in the pistil was  
500 hampered when compared with wild-type pollen grains (Fig. 2 and Fig. 3). In addition  
501 to its role in pollen grain development, through phenotypic studies, we showed that  
502 ANN5 was also involved in both embryo development and the transition from  
503 vegetative to generative growth (Table 1, Fig. 4). Suppression of *ANN5* resulted in  
504 extended vegetative development and reduced embryo size, whereas constitutive  
505 overexpression of *ANN5* positively influenced both pollen and embryo sizes. We thus

506 conclude that ANN5 promotes cell growth, predominantly during the reproductive  
507 development of Arabidopsis.

### 508 **An insight into the role of ANN5 in plastid function**

509 ANN5 displayed an unusual pattern of subcellular localization compared with the  
510 predominantly cytosolic localization observed for other plant annexins [11]. ANN5  
511 occupied two DNA-containing cellular compartments (nucleus and plastid) and  
512 associated with prominent sub-organellar structures (nucleolus and plastidial  
513 nucleoids) (Fig. 5 and Fig. 6). The plastidial localization of ANN5 in a subset of cells  
514 suggested that ANN5 was mobile and might traffic to the plastids. N-terminal tagging  
515 of ANN5 with GFP inhibited its targeting to plastids while its nuclear distribution  
516 remained unaffected (Fig. 5). This confirmed that the N-terminal domain was  
517 essential for ANN5 import to the plastids. Moreover, mass spectrometry analysis of  
518 the C-terminal GFP fusion of ANN5 detected the peptide derived from the N-terminal  
519 region, suggesting that this signal was not cleavable. However, a scenario in which  
520 nuclear import of ANN5 does not require processing but import into the plastids  
521 requires cleavage of the N-terminal signal peptide cannot be excluded. This scenario  
522 would imply that transport of ANN5 from the nucleus to plastids is unidirectional or,  
523 alternatively, that the N-terminal sequence is protected from cleavage in the plastids,  
524 thus allowing shuttling of ANN5 between compartments.

525 Plastids are plant-specific organelles that possess their own genome and complete  
526 gene expression system [27]. Each type of plastid, except gerontoplasts, contains  
527 multiple copies of plastidial DNA arranged into compact structures termed nucleoids.  
528 Plastid nucleoids contain RNA and a multitude of proteins involved in the  
529 maintenance of nucleoid functions such as transcription, replication, RNA processing,

530 and ribosome assembly [28, 29]. However, the majority of the proteins required for  
531 proper plastid function are encoded by the nuclear genome. Regulation of plastid  
532 functions is therefore continuously coordinated with the activity of the nuclear  
533 genome. An increasing body of evidence suggests that many nuclear proteins are  
534 also targeted to the plastids. The mechanism of dual targeting for many proteins is  
535 unclear. However, previous studies suggested that dual targeting might be either  
536 simultaneous or sequential [30]. Proteins that were initially targeted to the plastids  
537 and subsequently relocated to the nucleus might have a role in retrograde signaling.  
538 This mechanism of translocation was recently confirmed for HEMERA/pTAC12,  
539 which was targeted first to plastids and, after cleavage of its transit peptide, was  
540 relocated to the nucleus [31]. Our results suggest that ANN5 is localized primarily to  
541 the nucleus and then relocates to plastids. We hypothesize that ANN5 translocates  
542 from the nucleus directly to the plastidial nucleoid and then modifies plastid functions.  
543 Consistent with this model ANN5 negatively affected chlorophyll content and  
544 expression of the genes related to chlorophyll metabolism (Additional file 8). Principal  
545 component analysis (PCA) performed on expression levels of these genes, showed  
546 visible discrimination between groups corresponding to Col-0 and ANN5-  
547 overexpressing lines, suggesting a global influence of ANN5 presence on chlorophyll  
548 metabolism. Overexpression of ANN5 resulted in the reduced expression of genes  
549 involved in chlorophyll metabolism e.g. *HEMA1*, *GUN4*, *GUN5*, *CHL11*, *PsbA*, *LHCB1*  
550 and consequently in lower chlorophyll content. The fact that expression of the genes  
551 examined is sensitive to plastid signals [32-36] suggests that ANN5 is involved in  
552 communication between plastid and the nucleus. Interestingly, the addition of  
553 sucrose to the growth medium up-regulated genes associated with chlorophyll  
554 degradation in ANN5-overexpressing lines (*NYC1*, *NYE1*, *SAG29*) that implicates



555 ANN5 in sucrose signaling pathway. Further work is needed to indentify the specific  
556 signals that drive ANN5-dependent reprogramming of plastid function. Recent studies  
557 revealed that retrograde regulation of the nuclear gene expression involved calcium  
558 signaling [37]. Calcium ions were released from the plastids to the cytosol in  
559 response to specific stimuli [38]. Cytosolic calcium transients were mediated by a  
560 plastid-localized calcium-sensing receptor, CAS. This process activated a MAP  
561 (mitogen-activated protein) kinase cascade, which in turn regulated activity of  
562 transcription factor ABI4 in the nucleus. The pattern of ANN5 subcellular distribution  
563 together with its calcium-dependent lipid-binding capacity might reflect its role in the  
564 crosstalk between the nucleus and plastids or in intraorganellar calcium signaling.  
565 Notably, previous research showed that intracellular redistribution of annexins in  
566 response to particular environmental stimuli was induced by calcium transients in the  
567 cytosol [39].

568 In summary, we hypothesize that ANN5 acts as a specific calcium signature decoder  
569 and orchestrates plastidial and nuclear genome activities in response to  
570 developmental and environmental cues. Disturbed bilateral communication between  
571 the nucleus and plastids might explain the retardation of reproductive development in  
572 *ANN5* RNAi-silenced plants. However, our hypothesis that the intracellular  
573 redistribution of ANN5 is calcium-dependent requires experimental verification.

574 During plastid differentiation, nucleoids undergo intensive remodeling and changes in  
575 their spatial arrangement but remain associated with the plastidial internal membrane  
576 [29]. Although poorly developed, the internal membrane system of Arabidopsis pollen  
577 grain plastids is thought to be photosynthetically active [2]. Since both pollen and  
578 embryo are sink organs that take up nutrients from other parts of the plant, their

579 photosynthetic structures might be associated with processes other than conversion  
580 of light energy into sugars. Photosynthetic complexes in pollen grain plastids might  
581 act similarly to embryos and generate reactive oxygen species to regulate processes  
582 both inside plastids and, in response to the retrograde signaling, in the nucleus [40-  
583 42]. Recent studies suggested that plastidial nucleoids acted as a docking platform  
584 for the proteins involved in plastid metabolism that were regulated by redox changes  
585 in the photosynthetic apparatus [43]. One can thus speculate that ANN5, by  
586 combining membrane- and calcium ion-binding capacities, might act at the interface  
587 between the nucleoids and plastidial internal membranes. The majority of  
588 plastid/nucleus-targeted proteins were shown to be involved in plastid DNA/RNA  
589 metabolism or translation [44]. We therefore propose that ANN5 association with  
590 membrane-bound nucleoids may be required for transmission of signals from the  
591 photosynthetic apparatus to the transcription/translation machinery of the plastid.

592 *ANN5* expression correlated with post-meiotic development of microspores, which  
593 was accompanied by substantial reorganization of the plastid function. *ANN5*  
594 promoter activity was observed in the bicellular microspore [8], whereas *ANN5*  
595 mRNA levels were at their maximum in the tricellular microspore and remained high  
596 in mature pollen [7]. At the initial stage of pollen grain development, plastids  
597 intensively accumulate the starch that is deposited until the bicellular stage of  
598 microspore development [45]. From this stage until pollen grain maturity, deposited  
599 starch grains are almost completely hydrolyzed. Previous studies reported that  
600 plastids generated energy via glycolysis to support pollen maturation and pollen tube  
601 growth [6]. These findings together with our observation that ANN5 localized to  
602 plastids and affected the expression of the nuclear genes encoding plastid proteins  
603 raises the possibility that ANN5 may be involved in plastid reorganization at later

604 stages of pollen development. Starch grains accumulated in aborted pollen grains of  
605 the *ANN5* RNAi\_15 line. This suggested that abortion of pollen grains occurred at the  
606 bicellular stage, which was consistent with previous studies [8]. We thus conclude  
607 that suppression of *ANN5* disables progression to the next developmental stage and  
608 finally leads to pollen abortion at the bicellular stage (Fig. 7). Although average pollen  
609 grain size was significantly reduced in *ANN5* RNAi lines, individual pollen grains  
610 developed without any obvious aberrations (Fig. 2), possibly because *ANN5* was not  
611 completely suppressed (Fig. 2B). The *ANN5* knockdown phenotype resembled the  
612 phenotypes of *Arabidopsis* mutant lines defective in genes related to plastid function,  
613 including plastid glycolysis, that affected pollen formation, pollen tube growth, and  
614 embryogenesis [6, 46, 47]. Suppression of *ANN5* likely leads to plastid malfunction  
615 and, in turn, may affect the energy status of the cell and consequently lead to  
616 reduced growth or collapse of cells.

617

### 618 **Importance of the interaction between *ANN5* and *RABE1b* for plastid functions**

619 A large number of predicted plastid-targeted proteins were identified that co-purified  
620 with *ANN5*, including *RABE1b*, *GAPA* and *GAPB* subunits of glyceraldehyde 3-  
621 phosphate dehydrogenase (*GAPDH*), plastid chaperones, and ribosomal proteins  
622 (Additional file 6). Further characterization of *RABE1b* revealed physical interactions  
623 with *ANN5* within plastidial nucleoids (Fig. 6J). Although the biological function of  
624 *RABE1b* is unknown, the protein contains a GTPase domain and is classified as a  
625 member of the Rab GTPase family, suggesting that it may be involved in intracellular  
626 trafficking [48]. Several proteins involved in the transport machinery were predicted to  
627 be plastid targeted, raising suggestions of vesicular transport within plastids [49].  
628 Given that both annexins and Rab GTPases are implicated in membrane trafficking, it

629 is plausible that both ANN5 and RABE1b are required to maintain the organization  
630 and function of plastidial nucleoids attached to the plastid internal membranes.

631 RABE1b also exhibits sequence similarities to translation elongation factor  
632 EFTu/EF1A ([www.arabidopsis.org](http://www.arabidopsis.org)) therefore it is likely that belongs to the  
633 translational GTPases [50]. In our hypothetical model for ANN5 function, we propose  
634 that ANN5 interaction with RABE1b occurs in the plastid nucleoids in the bicellular  
635 microspore (Fig. 7). We hypothesize that cooperative action of ANN5 and RABE1b  
636 may drive the reprogramming of plastid function in maturing pollen grain. Further  
637 studies are required to elucidate the interplay between ANN5 and RABE1b in  
638 plastidial nucleoids and to determine whether their functions are associated with  
639 DNA/RNA metabolism or protein synthesis.

## 640 **Conclusions**

641 Collectively, through this work, we showed that ANN5 was required for basal  
642 developmental processes during the transition from vegetative to generative growth  
643 and for pollen and embryo development. ANN5 likely accomplishes these activities  
644 through its membrane trafficking function in the nucleus and plastidial nucleoids. Our  
645 future work will focus on how the interaction between ANN5 and RABE1b could  
646 influence plastid functions, particularly during pollen grain development.

## 647 **Abbreviations**

648 **FLIM-FRET** – Fluorescence Lifetime Imaging Microscopy-Förster Resonance Energy  
649 Transfer, **ld** – long day, **OE** - overexpression, **PCA** – principal component analysis,  
650 **RNAi** – RNA interference, **sd** – short day, **SD** – standard deviation, **VC** – vegetative  
651 cell.

652 **Declarations**

653 **Ethics approval and consent to participate**

654 Not applicable

655 **Consent for publication**

656 Not applicable.

657 **Availability of data and materials**

658 All data generated or analyzed during this study are included in this published article  
659 and its supplementary information files. Arabidopsis accessions: Col-0, An-1, Bay-0,  
660 C24, Ler-1, Mr-0, Oy-0 and Wa-1 were obtained from NASC (<http://arabidopsis.info/>).  
661 Agrikola binary plasmids (<http://www.agrikola.org/>) for targeted *ANN5* RNAi silencing  
662 were obtained from NASC (<http://arabidopsis.info/>). Arabidopsis lines generated in  
663 this study and materials integral to the findings presented in this article are available  
664 on request at the Institute of Biochemistry and Biophysics, Polish Academy of  
665 Science in Warsaw (Poland) in the laboratory of corresponding author Malgorzata  
666 Lichocka ([mlichocka@ibb.waw.pl](mailto:mlichocka@ibb.waw.pl)).

667 **Competing interests**

668 The authors declare that they have no competing interests.

669 **Funding**

670 This work was supported by Polish National Science Centre, Grant  
671 2012/05/B/NZ9/00984, to Malgorzata Lichocka.

672 **Author Contribution**

673 M.L. and J.H. conceived and directed the research. M.L., W.R., M.K. and J.H.  
674 designed the experiments. M.L., W.R., K.M., I.B.F., A.Ch., M.S., E.S. performed  
675 research and analyzed data. M.L., M.A.S., M.K. and J.H wrote the paper. All authors  
676 have read and approved the final version of the manuscript.

677 **Acknowledgements**

678 Imaging experiments were carried out using CePT infrastructure financed by the  
679 European Union's European Regional Development Fund (Innovative Economy  
680 2007-2013, Agreement POIG.02.02.00-14-024/08-00).

681

682 **Additional files**

683 **Additional file 1.** Analysis of *ANN5* transcript abundance in flowers at anthesis  
684 collected from *ANN5* RNAi-silenced and overexpressing lines.

685 **Additional file 2.** Phenotypic characteristics of *Arabidopsis* with altered *ANN5*  
686 expression cultivated under a 12 h light regime.

687 **Additional file 3.** Impact of RNAi-mediated suppression of *ANN5* on pollen viability.

688 **Additional file 4.** Ultrastructure of bicellular microgametophytes isolated from  
689 *Arabidopsis* lines with altered *ANN5* expression.

690 **Additional file 5.** Growth of pollen tubes in pistils 24 h after hand-pollination.

691 **Additional file 6.** List of plastidial proteins co-purified with *ANN5*-YFP and identified  
692 by mass spectrometry.

693 **Additional file 7.** Subcellular localization of RABE1b-GFP in *N. benthamiana* leaf  
694 epidermal cells.

695 **Additional file 8.** Overexpression of *ANN5* influences chlorophyll content and alters  
696 expression of genes related to chlorophyll metabolism in *Arabidopsis* seedlings.

697 **Additional file 9.** Oligonucleotides used for RT-qPCR.

698

699

## References

- 700 1. Owen HA, Makaroff CA: **Ultrastructure of microsporogenesis and microgametogenesis in**  
701 ***Arabidopsis thaliana* (L.) Heynh. ecotype Wassilewskija (Brassicaceae).** *Protoplasma*  
702 1995(185):7-21.
- 703 2. Kuang A, Musgrave ME: **Dynamics of vegetative cytoplasm during generative cell formation**  
704 **and pollen maturation in *Arabidopsis thaliana*.** *Protoplasma* 1996, **194**:81-90.
- 705 3. Pacini E, Guarnieri M, Nepi M: **Pollen carbohydrates and water content during**  
706 **development, presentation, and dispersal: a short review.** *Protoplasma* 2006, **228**(1-3):73-  
707 77.
- 708 4. Carrizo Garcia C, Nepi M, Pacini E: **It is a matter of timing: asynchrony during pollen**  
709 **development and its consequences on pollen performance in angiosperms-a review.**  
710 *Protoplasma* 2016.
- 711 5. Franchi G, Bellani L, Nepi M, Pacini E: **Types of carbohydrate reserves in pollen: localization,**  
712 **systematic distribution and ecophysiological significance.** *Flora* 1996, **191**:143-159.
- 713 6. Selinski J, Scheibe R: **Pollen tube growth: where does the energy come from?** *Plant Signal*  
714 *Behav* 2014, **9**(12):e977200.
- 715 7. Rutley N, Twell D: **A decade of pollen transcriptomics.** *Plant Reprod* 2015, **28**(2):73-89.
- 716 8. Zhu J, Yuan S, Wei G, Qian D, Wu X, Jia H, Gui M, Liu W, An L, Xiang Y: **Annexin5 is essential**  
717 **for pollen development in *Arabidopsis*.** *Mol Plant* 2014a, **7**(4):751-754.
- 718 9. Konopka-Postupolska D, Clark G: **Annexins as Overlooked Regulators of Membrane**  
719 **Trafficking in Plant Cells.** *Int J Mol Sci* 2017, **18**(4).
- 720 10. Davies JM: **Annexin-Mediated Calcium Signalling in Plants.** *Plants (Basel)* 2014, **3**(1):128-  
721 140.
- 722 11. Laohavisit A, Davies JM: **Annexins.** *New Phytol* 2011, **189**(1):40-53.
- 723 12. Laohavisit A, Brown AT, Cicuta P, Davies JM: **Annexins: Components of the calcium and**  
724 **reactive oxygen signaling network.** *Plant physiology* 2010, **152**(4):1824-1829.
- 725 13. Zhu J, Wu X, Yuan S, Qian D, Nan Q, An L, Xiang Y: **Annexin5 plays a vital role in *Arabidopsis***  
726 **pollen development via Ca<sup>2+</sup>-dependent membrane trafficking.** *PLoS One* 2014 Jul  
727 14;9(7):e102407 doi: 10.1371/journal.pone.0102407 eCollection 2014 2014b.
- 728 14. Herridge R, Day R, Baldwin S, Macknight R: **Rapid analysis of seed size in *Arabidopsis* for**  
729 **mutant and QTL discovery.** *Plant Methods* 2011, **7**(1):3.
- 730 15. Gosh A, Pareek A, Singla-Pareek SL: **Leaf Disc Stress Tolerance Assay for Tobacco.** *Bio-*  
731 *protocol* 2015, **5**(7).
- 732 16. Lee LY, Fang MJ, Kuang LY, Gelvin SB: **Vectors for multi-color bimolecular fluorescence**  
733 **complementation to investigate protein-protein interactions in living plant cells.** *Plant*  
734 *Methods* 2008, **4**:24.
- 735 17. Nakagawa T, Suzuki T, Murata S, Nakamura S, Hino T, Maeo K, Tabata R, Kawai T, Tanaka K,  
736 Niwa Y *et al*: **Improved Gateway binary vectors: high-performance vectors for creation of**  
737 **fusion constructs in transgenic analysis of plants.** *Biosci Biotechnol Biochem* 2007,  
738 **71**(8):2095-2100.

- 739 18. Hilson P, Allemeersch J, Altmann T, Aubourg S, Avon A, Beynon J, Bhalerao RP, Bitton F,  
740 Caboche M, Cannoot B *et al*: **Versatile gene-specific sequence tags for Arabidopsis**  
741 **functional genomics: transcript profiling and reverse genetics applications.** *Genome Res*  
742 2004, **14**(10B):2176-2189.
- 743 19. Clough SJ, Bent AF: **Floral dip: a simplified method for Agrobacterium-mediated**  
744 **transformation of Arabidopsis thaliana.** *Plant J* 1998, **16**(6):735-743.
- 745 20. Lu Y: **RNA Isolation from Arabidopsis Pollen Grains.** *Bio-protocol* [http://www.wbio-](http://www.wbio-protocol.org/e67)  
746 [protocol.org/e67](http://www.wbio-protocol.org/e67) 2011, **Bio101**: e67.
- 747 21. Giska F, Lichocka M, Piechocki M, Dadlez M, Schmelzer E, Hennig J, Krzymowska M:  
748 **Phosphorylation of HopQ1, a Type III Effector from Pseudomonas syringae, creates a**  
749 **binding site for host 14-3-3 proteins.** *Plant physiology* 2013, **161**(4):2049-2061.
- 750 22. Golinowski W, Grundler FMW, Sobczak M: **Changes in the structure of Arabidopsis thaliana**  
751 **during female development of the plant-parasitic nematode Heterodera schachtii.**  
752 *Protoplasma* 1996, **194**(1-2):103-116.
- 753 23. Kleemann J, Rincon-Rivera LJ, Takahara H, Neumann U, Ver Loren van Themaat E, van der  
754 Does HC, Hacquard S, Stuber K, Will I, Schmalenbach W *et al*: **Sequential delivery of host-**  
755 **induced virulence effectors by appressoria and intracellular hyphae of the phytopathogen**  
756 **Colletotrichum higginsianum.** *PLoS Pathog* 2012, **8**(4):e1002643.
- 757 24. Clark GB, Sessions A, Eastburn DJ, Roux SJ: **Differential expression of members of the**  
758 **annexin multigene family in Arabidopsis.** *Plant physiology* 2001, **126**(3):1072-1084.
- 759 25. Konopka-Postupolska D, Clark G, Hofmann A: **Structure, function and membrane**  
760 **interactions of plant annexins: An update.** *Plant Science* 2011, **181**(3):230-241.
- 761 26. Lizarbe MA, Barrasa JI, Olmo N, Gavilanes F, Turnay J: **Annexin-phospholipid interactions.**  
762 **Functional implications.** *Int J Mol Sci* 2013, **14**(2):2652-2683.
- 763 27. Sato S, Nakamura Y, Kaneko T, Asamizu E, Tabata S: **Complete structure of the chloroplast**  
764 **genome of Arabidopsis thaliana.** *DNA Res* 1999, **6**(5):283-290.
- 765 28. Majeran W, Friso G, Asakura Y, Qu X, Huang M, Ponnala L, Watkins KP, Barkan A, van Wijk KJ:  
766 **Nucleoid-enriched proteomes in developing plastids and chloroplasts from maize leaves: a**  
767 **new conceptual framework for nucleoid functions.** *Plant Physiol* 2012, **158**(1):156-189.
- 768 29. Powikrowska M, Oetke S, Jensen PE, Krupinska K: **Dynamic composition, shaping and**  
769 **organization of plastid nucleoids.** *Front Plant Sci* 2014, **5**:424.
- 770 30. Krause K, Krupinska K: **Nuclear regulators with a second home in organelles.** *Trends Plant Sci*  
771 2009, **14**(4):194-199.
- 772 31. Nevarez PA, Qiu Y, Inoue H, Yoo CY, Benfey PN, Schnell DJ, Chen M: **Mechanism of Dual**  
773 **Targeting of the Phytochrome Signaling Component HEMERA/pTAC12 to Plastids and the**  
774 **Nucleus.** *Plant Physiol* 2017, **173**(4):1953-1966.
- 775 32. McCormac AC, Terry MJ: **Light-signalling pathways leading to the co-ordinated expression**  
776 **of HEMA1 and Lhcb during chloroplast development in Arabidopsis thaliana.** *Plant J* 2002,  
777 **32**(4):549-559.
- 778 33. McCormac AC, Terry MJ: **The nuclear genes Lhcb and HEMA1 are differentially sensitive to**  
779 **plastid signals and suggest distinct roles for the GUN1 and GUN5 plastid-signalling**  
780 **pathways during de-etiolation.** *Plant J* 2004, **40**(5):672-685.
- 781 34. Ikegami A, Yoshimura N, Motohashi K, Takahashi S, Romano PG, Hisabori T, Takamiya K,  
782 Masuda T: **The CHL1 subunit of Arabidopsis thaliana magnesium chelatase is a target**  
783 **protein of the chloroplast thioredoxin.** *J Biol Chem* 2007, **282**(27):19282-19291.
- 784 35. Brzezowski P, Sharifi MN, Dent RM, Morhard MK, Niyogi KK, Grimm B: **Mg chelatase in**  
785 **chlorophyll synthesis and retrograde signaling in Chlamydomonas reinhardtii: CHL12 cannot**  
786 **substitute for CHL1.** *J Exp Bot* 2016, **67**(13):3925-3938.
- 787 36. Mochizuki N, Tanaka R, Tanaka A, Masuda T, Nagatani A: **The steady-state level of Mg-**  
788 **protoporphyrin IX is not a determinant of plastid-to-nucleus signaling in Arabidopsis.** *Proc*  
789 *Natl Acad Sci U S A* 2008, **105**(39):15184-15189.



- 790 37. Guo H, Feng P, Chi W, Sun X, Xu X, Li Y, Ren D, Lu C, David Rochaix J, Leister D *et al*: **Plastid-**  
791 **nucleus communication involves calcium-modulated MAPK signalling.** *Nat Commun* 2016,  
792 **7**:12173.
- 793 38. Stael S, Wurzing B, Mair A, Mehmer N, Vothknecht UC, Teige M: **Plant organellar calcium**  
794 **signalling: an emerging field.** *J Exp Bot* 2012, **63**(4):1525-1542.
- 795 39. Clark GB, Morgan RO, Fernandez MP, Roux SJ: **Evolutionary adaptation of plant annexins**  
796 **has diversified their molecular structures, interactions and functional roles.** *New Phytol*  
797 2012, **196**(3):695-712.
- 798 40. Alloreant G, Osorio S, Vu JL, Falconet D, Jouhet J, Kuntz M, Fernie AR, Lerbs-Mache S,  
799 Macherel D, Courtois F *et al*: **Adjustments of embryonic photosynthetic activity modulate**  
800 **seed fitness in Arabidopsis thaliana.** *New Phytol* 2015, **205**(2):707-719.
- 801 41. Kim C, Lee KP, Baruah A, Nater M, Gobel C, Feussner I, Apel K: **(1)O<sub>2</sub>-mediated retrograde**  
802 **signaling during late embryogenesis predetermines plastid differentiation in seedlings by**  
803 **recruiting abscisic acid.** *Proc Natl Acad Sci U S A* 2009, **106**(24):9920-9924.
- 804 42. Yoshida K, Hisabori T: **Two distinct redox cascades cooperatively regulate chloroplast**  
805 **functions and sustain plant viability.** *Proc Natl Acad Sci U S A* 2016, **113**(27):E3967-3976.
- 806 43. Melonek J, Oetke S, Krupinska K: **Multifunctionality of plastid nucleoids as revealed by**  
807 **proteome analyses.** *Biochim Biophys Acta* 2016, **1864**(8):1016-1038.
- 808 44. Krause K, Oetke S, Krupinska K: **Dual targeting and retrograde translocation: regulators of**  
809 **plant nuclear gene expression can be sequestered by plastids.** *Int J Mol Sci* 2012,  
810 **13**(9):11085-11101.
- 811 45. Quilichini TD, Douglas CJ, Samuels AL: **New views of tapetum ultrastructure and pollen**  
812 **exine development in Arabidopsis thaliana.** *Ann Bot* 2014, **114**(6):1189-1201.
- 813 46. Niewiadomski P, Knappe S, Geimer S, Fischer K, Schulz B, Unte US, Rosso MG, Ache P, Flugge  
814 UI, Schneider A: **The Arabidopsis plastidic glucose 6-phosphate/phosphate translocator**  
815 **GPT1 is essential for pollen maturation and embryo sac development.** *Plant Cell* 2005,  
816 **17**(3):760-775.
- 817 47. Datta R, Chamusco KC, Chourey PS: **Starch biosynthesis during pollen maturation is**  
818 **associated with altered patterns of gene expression in maize.** *Plant Physiol* 2002,  
819 **130**(4):1645-1656.
- 820 48. Vernoud V, Horton AC, Yang Z, Nielsen E: **Analysis of the small GTPase gene superfamily of**  
821 **Arabidopsis.** *Plant Physiol* 2003, **131**(3):1191-1208.
- 822 49. Paul P, Simm S, Mirus O, Scharf KD, Fragkostefanakis S, Schleiff E: **The complexity of vesicle**  
823 **transport factors in plants examined by orthology search.** *PLoS One* 2014, **9**(5):e97745.
- 824 50. Maracci C, Rodnina MV: **Review: Translational GTPases.** *Biopolymers* 2016, **105**(8):463-475.
- 825 51. Mori T, Kuroiwa H, Higashiyama T, Kuroiwa T: **GENERATIVE CELL SPECIFIC 1 is essential for**  
826 **angiosperm fertilization.** *Nat Cell Biol* 2006, **8**(1):64-71.
- 827  
828  
829

830 **Tables**

831

832 **Table 1.** Timing of reproductive development in Arabidopsis genotypes with altered  
833 *ANN5* expression.

---

| Genotypes                  | Bolting            |        | Flowering          |        | Silique formation  |        |
|----------------------------|--------------------|--------|--------------------|--------|--------------------|--------|
|                            | [days]             |        |                    |        |                    |        |
| <b>Col-0</b>               | 28.58              | ± 0.92 | 34.67              | ± 1.26 | 38.08              | ± 1.17 |
| <b><i>ANN5-RNAi_13</i></b> | 35.67 <sup>a</sup> | ± 0.89 | 44.83 <sup>a</sup> | ± 1.36 | 49.17 <sup>a</sup> | ± 1.27 |
| <b><i>ANN5-RNAi_15</i></b> | 36.08 <sup>a</sup> | ± 0.62 | 47.10 <sup>a</sup> | ± 0.63 | 50.25 <sup>a</sup> | ± 0.84 |
| <b><i>ANN5-OE_2</i></b>    | 30.09              | ± 1.91 | 35.45              | ± 1.53 | 38.82              | ± 1.44 |

---

834

835 Plants were cultivated under a short day/long day regime. Values represent days  
836 after germination ± standard error, n = 7 individual plants per line. <sup>a</sup> denotes  
837 statistically significant difference (p < 0.05 Dunnett test). See also Additional file 2.

838

839 **Figure legends**

840 **Fig. 1.** *ANN5* expression profiles.

841 (A) Average expression of *ANN5* in different organs of wild-type Arabidopsis Col-0.

842 (B) Average expression of *ANN5* in reproductive structures of wild-type Arabidopsis  
843 Col-0.

844 (C) Average expression of *ANN5* in floral buds and flowers at anthesis collected from  
845 different Arabidopsis genotypes. n = 3 biological replicates. Bars represent SD.

846

847 **Fig. 2.** Impact of *ANN5* expression on mature pollen grain size.

848 (A) Scanning electron micrographs of the pollen grains from wild-type Arabidopsis  
849 (Col-0), *ANN5*-RNAi\_15, *ANN5*-RNAi\_13, and *ANN5*-OE\_2. Scale bars = 10  $\mu$ m.

850 (B) Relative expression of *ANN5* in mature pollen grains of wild-type Arabidopsis  
851 (Col-0), *ANN5*-RNAi\_15, *ANN5*-RNAi\_13, and *ANN5*-OE\_2. Bars represent SD.

852 (C) Mean length of mature pollen grains from wild-type Arabidopsis (Col-0), *ANN5*-  
853 RNAi\_15, *ANN5*-RNAi\_13, and *ANN5*-OE\_2. n = 50. Asterisks indicate significant  
854 difference compared with values for wild-type pollen (one-way ANOVA, Dunnett post  
855 hoc test, \*p < 0.05; \*\*p < 0.01; \*\*\*p < 0.001). Bars represent SD.

856 (D) and (E) Ultrastructure of viable and collapsing pollen grains from Arabidopsis  
857 genotypes with altered *ANN5* expression. (D) Transmission electron micrographs  
858 showing ultrastructural details of viable mature pollen grains, whereas (E) depicts  
859 aborted pollen grains isolated during anthesis from wild-type Arabidopsis Col-0,

860 *ANN5*-RNAi\_15, *ANN5*-RNAi\_13, and *ANN5*-OE\_2. See also Additional file 3 and  
861 Additional file 4.

862 Nu: nucleus, black arrow: plastid. Scale bars = 5  $\mu$ m.

863

864 **Fig. 3.** Pollen tube growth in pistils in *ANN5* RNAi-silenced lines.

865 Pollen tubes were fixed and stained with Aniline Blue 6 h after hand-pollination of (A)  
866 wild-type Col-0, (B) *ANN5*-RNAi\_15, (C) *ANN5*-RNAi\_13, and (D) *ANN5*-OE\_2  
867 plants. Aniline blue staining of pollen tubes was performed as described by  
868 [51]. Yellow arrows indicate pollen tube length measured from the top of style to the  
869 front of the longest pollen tube. (E) Average lengths of pollen tubes in pistils.  $n = 3$   
870 independent experiments. Asterisk indicates significant difference compared with the  
871 wild type (one-way ANOVA, Dunnett post hoc test, \* $p < 0.05$ ; \*\* $p < 0.01$ ; \*\*\* $p <$   
872  $0.001$ ). See also Additional file 5. Scale bars = 200  $\mu$ m.

873

874 **Fig. 4.** Impact of *ANN5* expression on seed yield.

875 (A) Dry seeds isolated from siliques at positions 36–40 of the main bolt and embryos  
876 dissected from rehydrated seeds of wild-type Arabidopsis (Col-0), *ANN5*-RNAi\_15,  
877 *ANN5*-RNAi\_13, and *ANN5*-OE\_2. Scale bars = 500  $\mu$ m.

878 (B) Average sizes of pooled seeds from a single biological replicate.  $n = 1000$ . Three  
879 independent experiments were performed with similar outcomes. Asterisks indicate  
880 significant differences compared with wild-type seeds (one-way ANOVA, Dunnett  
881 post hoc test, \* $p < 0.05$ ; \*\* $p < 0.01$ ; \*\*\* $p < 0.001$ ). Bars represent SD.

882 (C) Average sizes of seeds collected from siliques at specified positions on the main  
883 bolt, pooled from a single biological replicate.  $n = 120\text{--}150$ . Bars represent SD.

884

885 **Fig. 5.** Subcellular localization of ANN5 in epidermal cells.

886 Confocal optical sections of *N. benthamiana* leaf epidermal cells depicting  
887 localization of (A) C-terminus tagged ANN5 (35S:ANN5-GFP), (B) ANN5-GFP  
888 localization merged with chlorophyll autofluorescence, (C) N-terminus tagged ANN5  
889 (35S:GFP-ANN5), and (D) GFP-ANN5 localization merged with chlorophyll  
890 autofluorescence. Scale bars = 10  $\mu\text{m}$ .

891 (E) Confocal optical section of two neighboring epidermal cells revealing different  
892 patterns of ANN5-GFP localization within plastids. White asterisks denote plastids  
893 containing ANN5-GFP. Scale bar = 10  $\mu\text{m}$ .

894 (F) Percentage of cells showing nucleo-cytoplasmic (N-C) or plastidial (Ch)  
895 localization of ANN5-GFP, and GFP-ANN5. The data were obtained in three  
896 independent experiments. Bars represent SD.

897 **Fig. 6.** ANN5 interacts with RABE1b in plastidial nucleoids.

898 Upper panel (A–B): Confocal optical section of *N. benthamiana* leaf epidermal plastid  
899 transiently expressing ANN5-YFP (A) and counterstained with DAPI (1  $\mu\text{g ml}^{-1}$  for 15  
900 min at room temperature) after fixation with 2% paraformaldehyde (24 h at 4°C) (B).  
901 Pseudocolored fluorescence of (A) ANN5-YFP (yellow), (B) DAPI (magenta), (C)  
902 merged channels of ANN5-YFP and DAPI, and (D) overlaid with chlorophyll  
903 autofluorescence (blue).

904 Lower panel (E–H): Confocal optical section of *N. benthamiana* leaf epidermal plastid  
905 transiently co-expressing ANN5-YFP (E) and RABE1b-CFP (F). Pseudocolored  
906 fluorescence of (E) ANN5-YFP (yellow), (F) RABE1b-CFP (magenta), (G) merged  
907 channels of ANN5-YFP and RABE1b-CFP, and (H) overlaid with chlorophyll  
908 autofluorescence (blue). See also Additional file 7. Scale bar = 10  $\mu$ m.

909 (J) FLIM-FRET analysis of interactions between ANN5 and RABE1b in plastidial  
910 nucleoids. Average CFP lifetime was measured in the donor leaf samples of *N.*  
911 *benthamiana* expressing only RABE1b-CFP and in the presence of acceptor in  
912 samples co-expressing RABE1b-CFP and ANN5-YFP.  $n = 7$  individual epidermal  
913 cells. Measurements were performed on a single plastid per cell, \*\* indicates  
914 statistically significant differences (Student's t-test,  $p < 0.05$ ).

915 **Fig. 7.** Hypothetical model for the role of ANN5 in pollen development.

916 *ANN5* expression appears to be precisely temporally controlled during  
917 microgametophyte development in *Arabidopsis*. Onset of *ANN5* expression occurs in  
918 the bicellular pollen grain and remains expressed until maturation. Kinetics of *ANN5*  
919 expression correlate with reorganization of pollen plastid functions followed by  
920 gradual hydrolysis of deposited starch grains and progressive growth of the  
921 vegetative cell. *ANN5* is dually located within the nucleus and plastidial nucleoids and  
922 may thus be involved in the crosstalk between nuclear and plastidial genomes (see  
923 also Additional file 8). Suppression of *ANN5* expression results in arrested plastid  
924 reorganization followed by pollen abortion. *ANN5* interacted with RABE1b, a putative  
925 translational GTPase, within plastidial nucleoids. This model proposes that the  
926 physical interactions between *ANN5* and RABE1b trigger a reprogramming of plastid  
927 function that is critical for proper pollen maturation. Disorder in cellular metabolism in

928 genotypes with silenced expression of *ANN5* results in formation of smaller pollen  
929 grains and lower pollen viability.

930 Nu: nucleus, P: plastid.

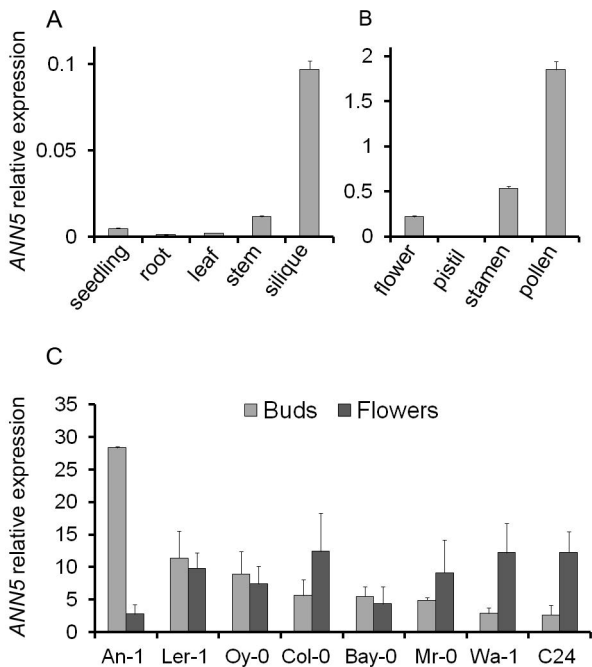



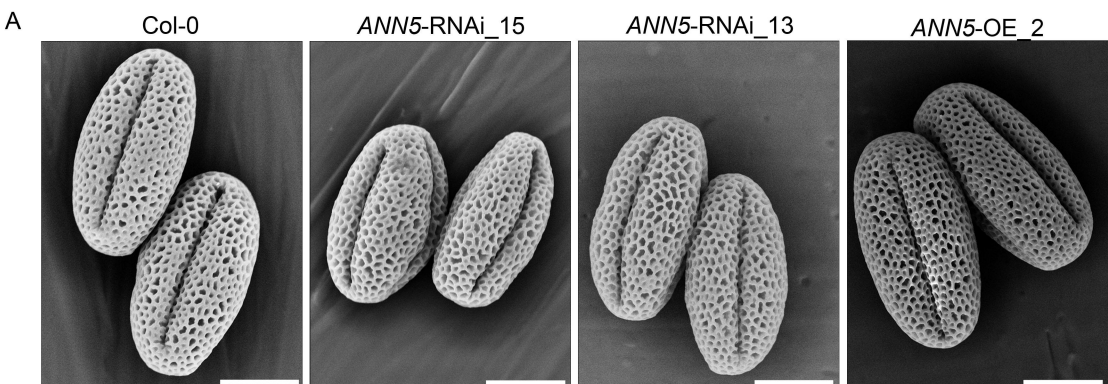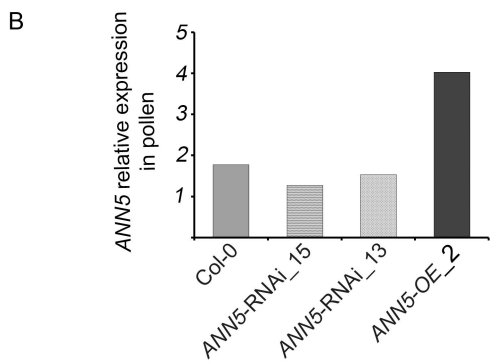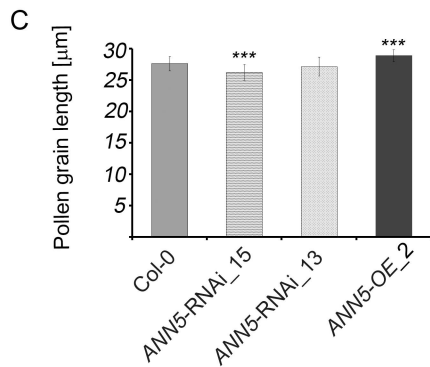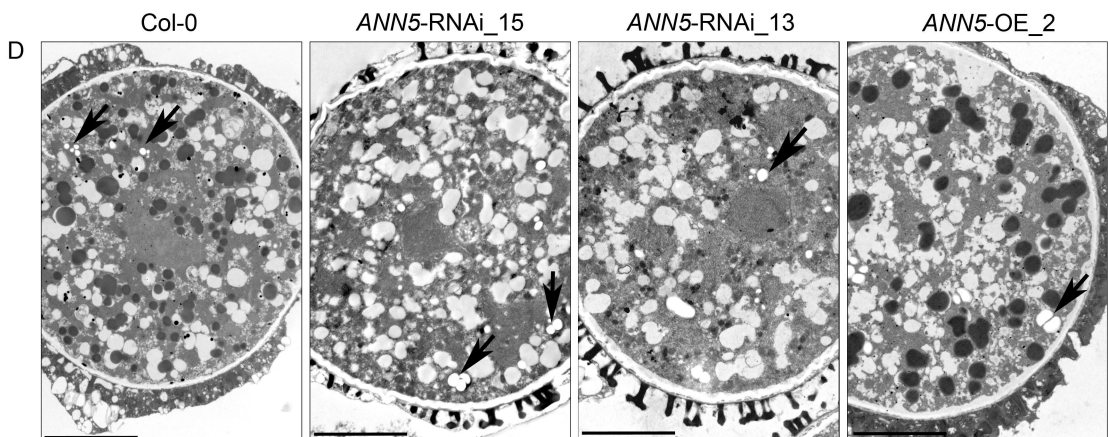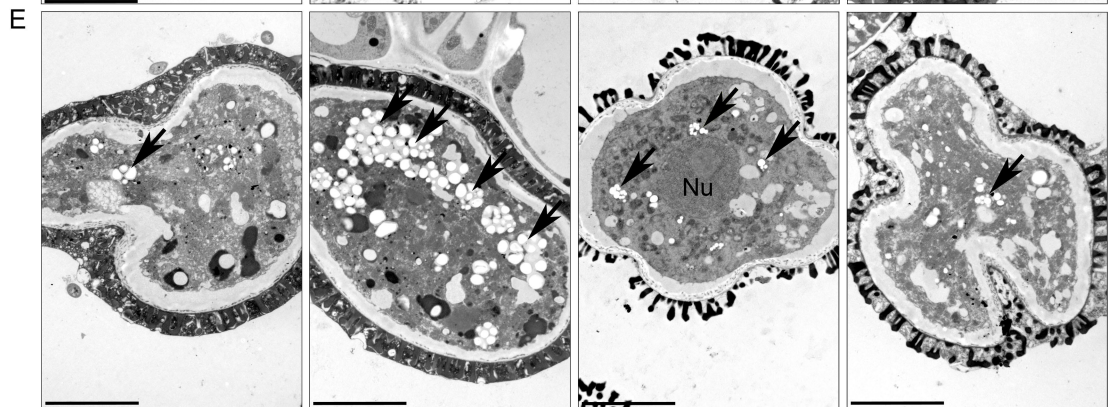

Col-0

ANN5-RNAi\_15

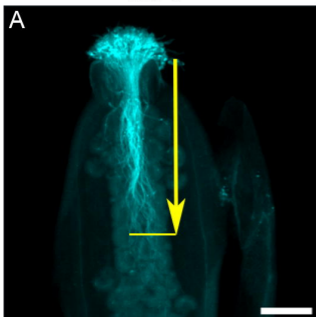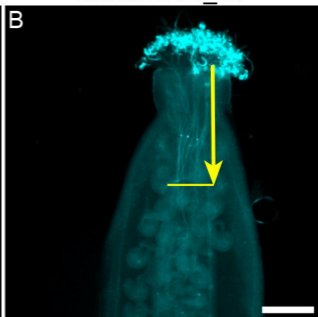

ANN5-RNAi\_13

ANN5-OE\_2

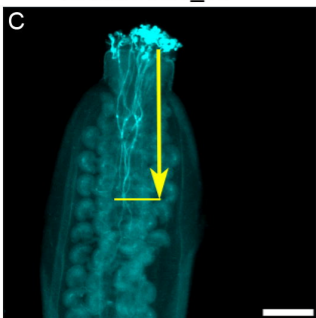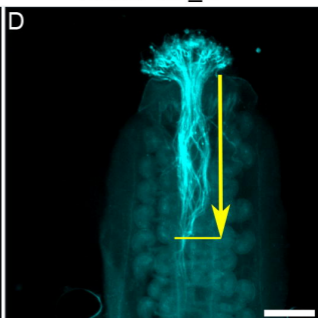

E

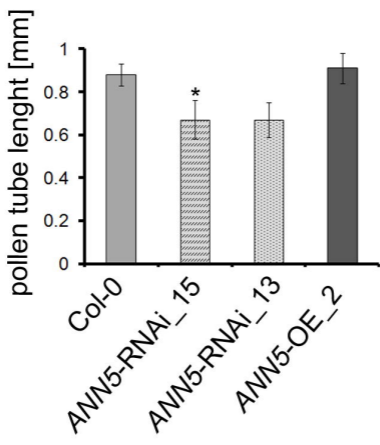

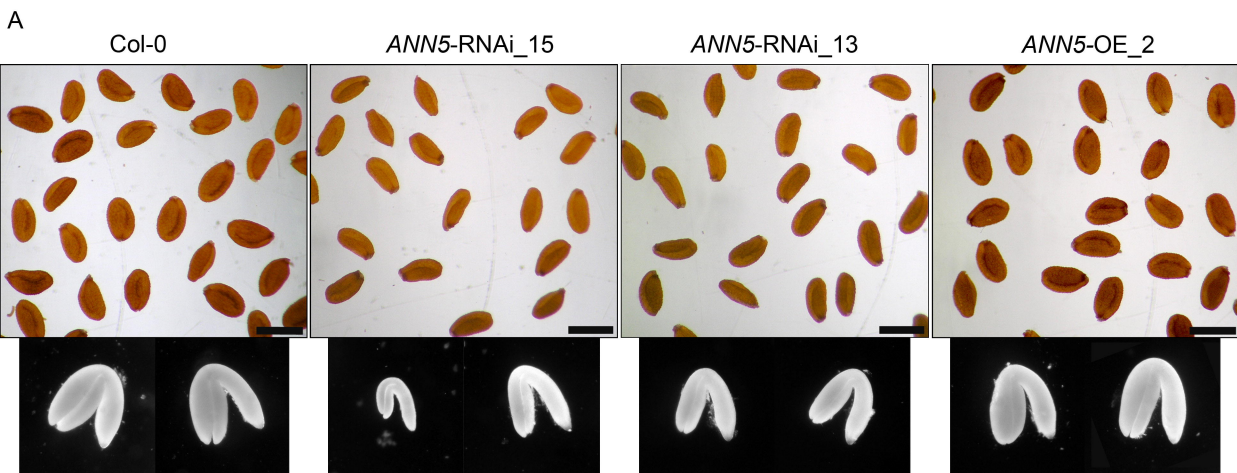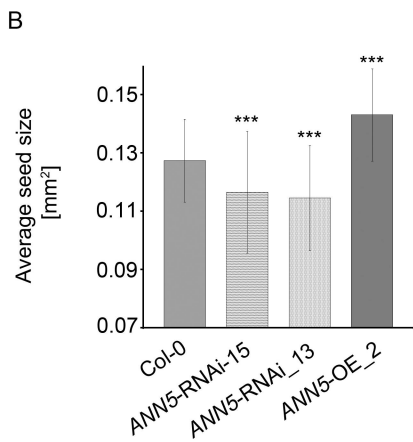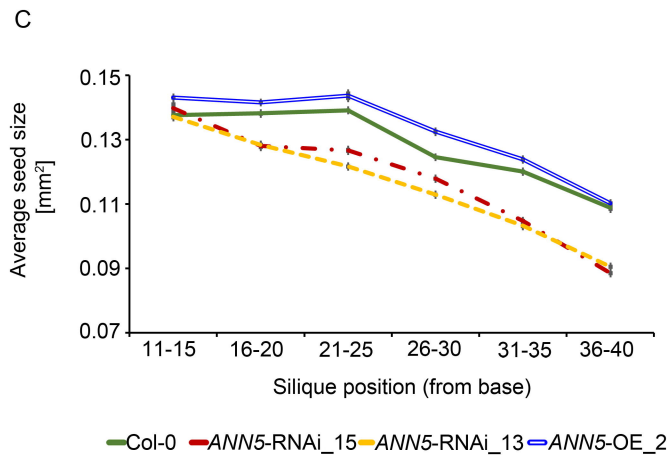

ANN5-GFP

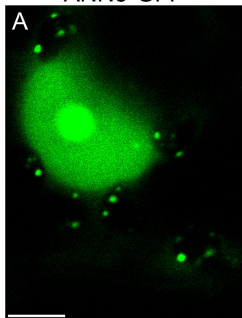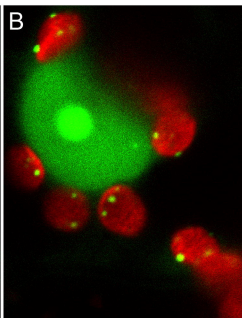

GFP-ANN5

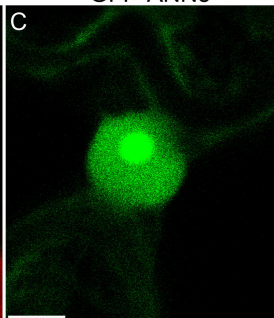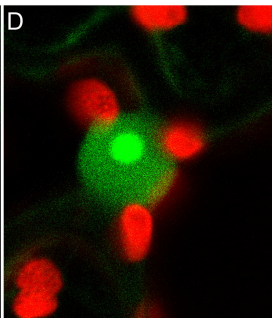

ANN5-GFP

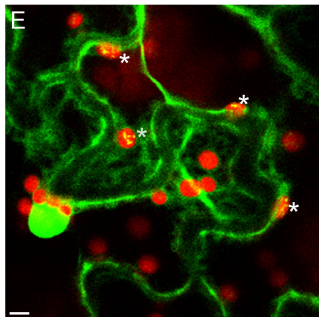

F

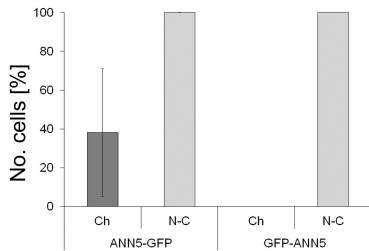



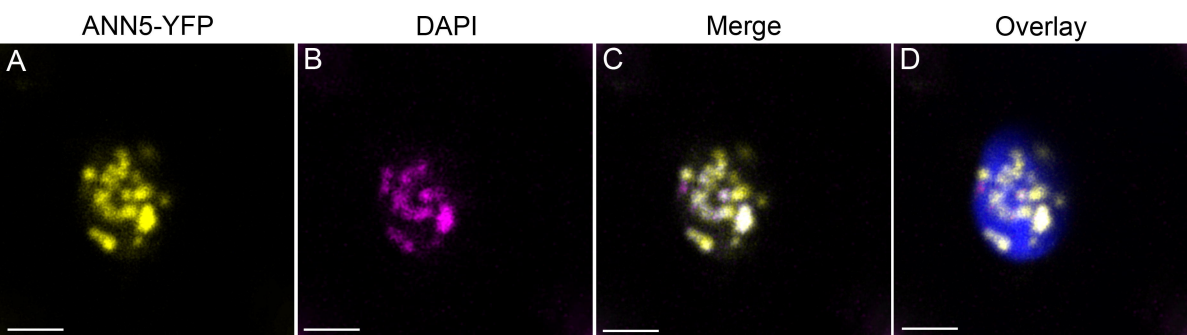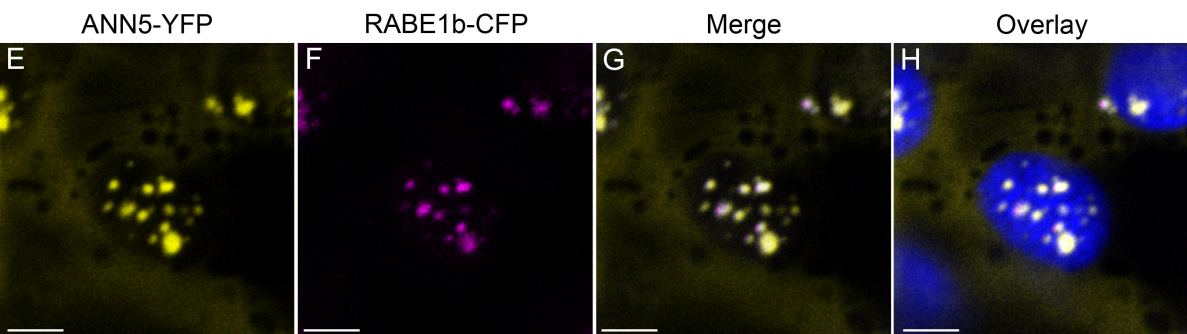

**J**

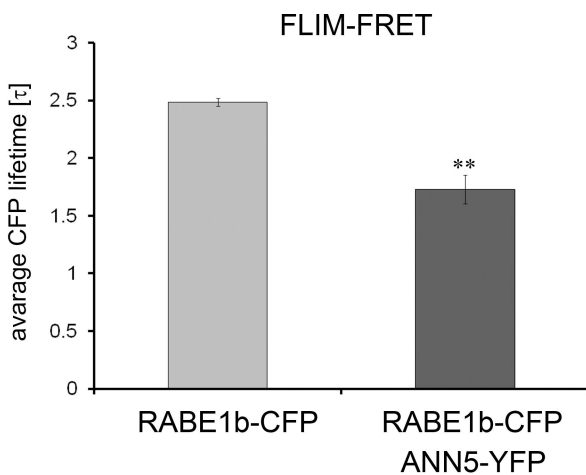

pre-mature microspore

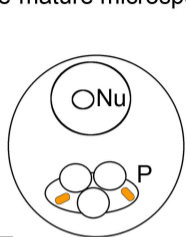

WT

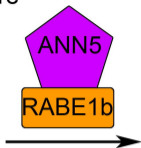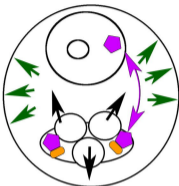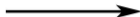

mature pollen grain

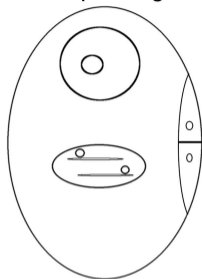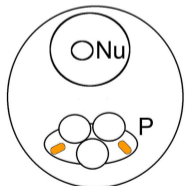

ANN5 RNAi-silenced  
microspore

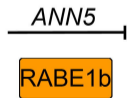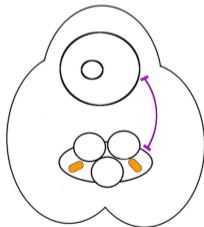

pollen grain collapse
